# Supplementary material
Source: publisher figshare collection journal article supplement (https://gsajournals.figshare.com/ndownloader/files/25296326)
Supplement: Supplementary file 1 [file 25296326]

## Sheet: Hrq1
Table S6. Hrq1-interacting proteins.
PROTID	GENE	HRQ1 Fold Change A (Standard)	HRQ1 Fold Change B (Stringent)	HRQ1 SAINT probability
HRQ1	HRQ1	179.9	65.14	1
TSR1	TSR1	41.54	41.46	1
URB1	URB1	29.27	26.5	1
ESF1	ESF1	26.63	26.33	1
DBP10	DBP10	34.7	23.69	1
ROK1	ROK1	24.28	23.59	1
PUS1	PUS1	28.57	21.32	1
DIP2	DIP2	25.35	20.4	1
FUN12	FUN12	45.5	19.69	1
HTA1	HTA1	35.42	18.69	1
RPA49	RPA49	24.22	17.17	1
SSF1	SSF1	17.98	16.2	1
DBP9	DBP9	16.68	16	1
CBF5	CBF5	37.78	15.73	1
PHO84	PHO84	19.76	15.36	1
RTG3	RTG3	16.19	15.13	1
RPL12A	RPL12A	36.81	14.96	1
NOP8	NOP8	13.8	12.94	1
RFC3	RFC3	18.32	11.46	1
ENP2	ENP2	11.46	11.37	1
SDA1	SDA1	25.77	10.63	1
TY1B-NL2	TY1B-NL2	19.37	7.14	1
SEC1	SEC1	10.32	7	1
DBP3	DBP3	16.32	6.29	1
RPL23A	RPL23A	10.69	3.86	1
TY1B-NL1	TY1B-NL1	7.11	2.89	1
RPL43A	RPL43A	6.43	2.36	1
RPL1A	RPL1A	4.82	1.64	1
HHF1	HHF1	4.29	1.45	1
CDC73	CDC73	3.96	1.4	1
NSR1	NSR1	3.74	1.25	1
CTR9	CTR9	3.04	1.03	1
FPR4	FPR4	28.13	17.6	0.99
KRE33	KRE33	28.49	14.79	0.99
APL5	APL5	14.39	11.98	0.99
RPS25B	RPS25B	10.42	10.42	0.99
CIC1	CIC1	14.64	9.74	0.99
KSP1	KSP1	3.83	1.33	0.99
RRT14	RRT14	1.87	0.65	0.99
RPS19A	RPS19A	20.33	16.19	0.98
ECM16	ECM16	15.11	13.09	0.98
RIX7	RIX7	13.86	11.55	0.98
RFC4	RFC4	12.52	11.46	0.98
AIR2	AIR2	11.73	10.98	0.98
NHP2	NHP2	10.89	9.35	0.98
BUD21	BUD21	9.37	9.24	0.98
MAK5	MAK5	11.51	9.21	0.98
DHR2	DHR2	8.58	8.49	0.98
RRP8	RRP8	9.15	8.01	0.98
NOP56	NOP56	6.57	2.38	0.98
SRP21	SRP21	6.32	2.18	0.98
GAR1	GAR1	4.53	1.64	0.97
RPS6A	RPS6A	1.09	0.35	0.97
SGD1	SGD1	7.8	7.56	0.96
LEU2	LEU2	9.26	4.18	0.96
NUG1	NUG1	21.3	10.53	0.94
UTP10	UTP10	9.6	4.95	0.94
ERB1	ERB1	11.89	4.89	0.94
SCJ1	SCJ1	14.66	9.58	0.93
RLP7	RLP7	11.8	7.92	0.93
FPR3	FPR3	17.52	9.15	0.92
RET2	RET2	9.27	6.2	0.92
LEO1	LEO1	3.73	1.42	0.92
MRD1	MRD1	8.97	7.07	0.91
NIP1	NIP1	9.69	4.94	0.9
RPB5	RPB5	12.45	7.73	0.89
RPS8A	RPS8A	2.09	0.71	0.89
NOC2	NOC2	11.29	7.88	0.88
GIN4	GIN4	10.3	7.19	0.88
UTP9	UTP9	15.69	8.73	0.87
RRP12	RRP12	10.51	5.22	0.87
MPP10	MPP10	1.63	0.54	0.85
BMS1	BMS1	10.1	7.11	0.84
PDS5	PDS5	1.69	0.55	0.84
MOT1	MOT1	1.31	0.48	0.84
NSA2	NSA2	11.36	6.37	0.79
UTP22	UTP22	8.7	5.54	0.76
SRP14	SRP14	7.02	5.26	0.76
NOP14	NOP14	9.5	5.58	0.73
RPA135	RPA135	12.71	7.25	0.7
NAN1	NAN1	11.9	6.51	0.69
SRP40	SRP40	8.36	5.17	0.68
DMC1	DMC1	11.99	6.7	0.67
HAS1	HAS1	12.5	6.6	0.67
SAE2	SAE2	11.44	6.52	0.67
MDJ1	MDJ1	10.93	6.3	0.67
BRX1	BRX1	11.17	4.31	0.67
UTP21	UTP21	14.63	10.8	0.66
ERV25	ERV25	12	8.07	0.66
NDE1	NDE1	8.33	7.66	0.66
UFD4	UFD4	8.05	7.14	0.66
UTP5	UTP5	7.54	7.03	0.66
CLU1	CLU1	14.82	5.72	0.66
YTA7	YTA7	6.49	4.38	0.66
CHA1	CHA1	10.07	3.59	0.66
RCL1	RCL1	7.01	6.33	0.65
YMR295C	YMR295C	7.01	6.33	0.65
PRE10	PRE10	6.75	6.27	0.65
NOC4	NOC4	6.5	6.24	0.65
RPB8	RPB8	5.45	3.89	0.65
CDC26	CDC26	5.45	3.89	0.65
NOP1	NOP1	15.64	6.52	0.63
SDS23	SDS23	5.71	5.56	0.63
GCN3	GCN3	5.18	3.75	0.63
UTP8	UTP8	7.47	3.47	0.63
FCF1	FCF1	4.66	3.46	0.63
SEC16	SEC16	4.91	3.23	0.63
POL2	POL2	4.43	2.98	0.63
NAM7	NAM7	6.29	4.85	0.62
OLE1	OLE1	7.85	5.27	0.61
MCM7	MCM7	6.96	4.91	0.6
DUN1	DUN1	5.47	2.81	0.6
TIF4632	TIF4632	6.43	4.86	0.59
CKA1	CKA1	6.5	4.75	0.58
TIF4631	TIF4631	7.26	4.01	0.58
UTP18	UTP18	5.48	4.01	0.52
NOP7	NOP7	6.76	2.59	0.49
SNC1	SNC1	5.14	3.79	0.48
NOP4	NOP4	5.51	2.36	0.44
NOC3	NOC3	3.93	2.22	0.44
RRP5	RRP5	8.24	4.4	0.43
TAE2	TAE2	6.51	3.38	0.43
CKB1	CKB1	6.52	3.99	0.41
KRR1	KRR1	5.58	3.12	0.4
IMP4	IMP4	5.02	3.31	0.39
ESF2	ESF2	4.41	2.07	0.39
RBG1	RBG1	4.68	2.86	0.38
SPB1	SPB1	4.54	1.9	0.36
YIP5	YIP5	3.76	2.01	0.35
SPB4	SPB4	7.03	6.03	0.33
JIP5	JIP5	5.18	3.5	0.33
HEF3	HEF3	5.18	3.5	0.33
DOA1	DOA1	4.41	3.22	0.33
NOP53	NOP53	4.15	2.19	0.33
TIM11	TIM11	4.15	2.19	0.33
SLH1	SLH1	5.13	2.03	0.33
URB2	URB2	3.36	2.01	0.33
NOP58	NOP58	5.06	1.84	0.33
OSH3	OSH3	4.36	1.67	0.33
CHD1	CHD1	4.82	1.59	0.33
BCH1	BCH1	4.16	1.5	0.33
EGD1	EGD1	1.51	0.44	0.33
SMD1	SMD1	4.92	4.66	0.32
HOS3	HOS3	4.92	4.66	0.32
MRH4	MRH4	4.66	4.61	0.32
PTI1	PTI1	4.93	3.92	0.32
ROD1	ROD1	5.27	3.75	0.32
KEL3	KEL3	4.81	3.7	0.32
TOA2	TOA2	4.13	3.11	0.32
MRC1	MRC1	4.13	3.11	0.32
SAP1	SAP1	3.88	2.9	0.32
REP1	REP1	3.88	2.9	0.32
HAA1	HAA1	3.88	2.9	0.32
ECM30	ECM30	3.62	2.87	0.32
DSF1	DSF1	3.62	2.87	0.32
HUL5	HUL5	3.62	2.87	0.32
CCE1	CCE1	3.62	2.87	0.32
RRP9	RRP9	4.19	2.04	0.32
RPO26	RPO26	3.09	1.94	0.32
YHR177W	YHR177W	3.09	1.94	0.32
YDR026C	YDR026C	3.09	1.94	0.32
YBR238C	YBR238C	3.09	1.94	0.32
MIG1	MIG1	2.57	1.79	0.32
SKI2	SKI2	2.57	1.79	0.32
JJJ1	JJJ1	2.57	1.79	0.32
SPP382	SPP382	2.57	1.79	0.32
YLR049C	YLR049C	2.57	1.79	0.32
MAG2	MAG2	2.57	1.79	0.32
YSC83	YSC83	2.57	1.79	0.32
RPL20A	RPL20A	2.57	1.79	0.32
VPS53	VPS53	2.57	1.79	0.32
FOL3	FOL3	2.57	1.79	0.32
PIN2	PIN2	2.57	1.79	0.32
CUE3	CUE3	2.57	1.79	0.32
YHR127W	YHR127W	2.57	1.79	0.32
SEH1	SEH1	2.97	1.44	0.32
STE20	STE20	2	0.71	0.32
SOF1	SOF1	4.01	3.1	0.31
APL4	APL4	3.43	2.47	0.31
TMA23	TMA23	3.44	2.47	0.31
SWA2	SWA2	2.94	1.67	0.31
SMC3	SMC3	2.28	0.94	0.31
BFR2	BFR2	7.85	4.57	0.3
MDM20	MDM20	5.03	3.36	0.3
RPF1	RPF1	3.72	2.07	0.3
SYN8	SYN8	3.04	1.52	0.3
XRN1	XRN1	10.11	4.05	0.29
NUP157	NUP157	3.92	1.92	0.29
KRI1	KRI1	3.53	1.77	0.29
CCP1	CCP1	3.25	1.39	0.29
SRP72	SRP72	3.81	2.19	0.28
SEC28	SEC28	3.9	1.95	0.28
SVL3	SVL3	2.9	1.35	0.28
ESC1	ESC1	3.22	1.17	0.28
TRM82	TRM82	4.41	0.96	0.28
AFG2	AFG2	1.33	0.26	0.28
SNU13	SNU13	0.32	0.04	0.28
RSA3	RSA3	3.28	1.22	0.27
OYE2	OYE2	3.07	0.83	0.27
HRB1	HRB1	3.27	2.17	0.26
CKB2	CKB2	3.27	2.17	0.26
RPB3	RPB3	2.27	1.28	0.26
YNR029C	YNR029C	2.27	1.28	0.26
MET6	MET6	2.19	0.87	0.26
MCM3	MCM3	4.17	1.47	0.25
RFC2	RFC2	3.41	1.33	0.25
RPC40	RPC40	7.53	3.97	0.24
TRM8	TRM8	2.66	1.31	0.24
RPC34	RPC34	3.13	1.11	0.24
SRP68	SRP68	3.85	1.9	0.23
APM3	APM3	3.41	1.71	0.23
ECM29	ECM29	2.24	0.8	0.23
CKA2	CKA2	4.25	3.16	0.22
RRS1	RRS1	4.15	2.99	0.22
REX2	REX2	4.15	2.99	0.22
GBP2	GBP2	3.97	2.64	0.22
LSG1	LSG1	5.64	2.4	0.22
YLR241W	YLR241W	3.27	1.86	0.22
SUM1	SUM1	3.05	1.85	0.22
RPB10	RPB10	2.44	1.08	0.22
NOP12	NOP12	5.09	3.03	0.21
NUP170	NUP170	4.52	2.68	0.21
RPB4	RPB4	3.35	1.65	0.21
NOB1	NOB1	3.21	1.52	0.21
NFS1	NFS1	3.38	1.32	0.19
TMA46	TMA46	2.13	1.1	0.19
PBP1	PBP1	1.59	0.62	0.19
FET4	FET4	1.91	0.62	0.19
PET127	PET127	2.86	1.6	0.18
PRO2	PRO2	2.49	1.13	0.17
ARL1	ARL1	0.32	0.06	0.17
NOP15	NOP15	2.04	1	0.16
RPA43	RPA43	2.27	0.88	0.16
NOG1	NOG1	9.46	4.47	0.15
PSP2	PSP2	2.75	1.47	0.15
SLA1	SLA1	2.34	0.99	0.15
FUN30	FUN30	2.21	0.89	0.15
SNF1	SNF1	2.62	0.52	0.13
LYS2	LYS2	2.3	1.04	0.12
PRP43	PRP43	5	3.05	0.11
TAF6	TAF6	2.56	1.02	0.11
ATG27	ATG27	4.11	1.78	0.1
RFA2	RFA2	2.12	0.88	0.1
GCD2	GCD2	1.68	0.69	0.1
POL5	POL5	3.09	2.12	0.09
KAP95	KAP95	3.27	1.19	0.09
TAF5	TAF5	1.71	0.82	0.09
UTP4	UTP4	3.27	1.59	0.08
CPR1	CPR1	3.25	1.33	0.07
VID27	VID27	2.45	1.11	0.07
NUM1	NUM1	2.3	1.09	0.07
SAS10	SAS10	1.96	0.75	0.07
AHP1	AHP1	1.82	0.68	0.07
RNQ1	RNQ1	2.63	1.06	0.06
UTP15	UTP15	1.68	0.74	0.06
SEA4	SEA4	1.98	0.72	0.06
GET4	GET4	1.98	0.51	0.06
DUS3	DUS3	1.09	0.33	0.06
SRP1	SRP1	4.31	2.36	0.05
CPS1	CPS1	3.02	1.21	0.05
MDN1	MDN1	2.29	0.73	0.05
YHB1	YHB1	6.19	3.02	0.04
MSS116	MSS116	3.76	1.38	0.04
LIA1	LIA1	1.55	0.64	0.04
DHH1	DHH1	1.81	0.31	0.04
PWP1	PWP1	4.75	2.53	0.03
RPT3	RPT3	4.62	2.06	0.03
SRO9	SRO9	4.14	1.63	0.03
TAP42	TAP42	0.32	0.11	0.03
ILV5	ILV5	8.58	3.83	0.02
IKI3	IKI3	3.53	1.6	0.02
YGR054W	YGR054W	2.48	1.42	0.02
NAB6	NAB6	2.06	1.06	0.02
HRP1	HRP1	2.45	0.91	0.02
RFA1	RFA1	1.78	0.85	0.02
RPN13	RPN13	1.58	0.56	0.02
TOM1	TOM1	1.41	0.47	0.02
GCN20	GCN20	3.55	1.69	0.01
NOT3	NOT3	4.16	1.62	0.01
SSD1	SSD1	3.75	1.53	0.01
SCS2	SCS2	2.79	1.16	0.01
RPB2	RPB2	2.52	1.13	0.01
RPP1A	RPP1A	2.51	1	0.01
RAP1	RAP1	2.27	0.85	0.01
LSB3	LSB3	1.7	0.81	0.01
SSO2	SSO2	1.93	0.78	0.01
TOP2	TOP2	1.91	0.66	0.01
ATP4	ATP4	1.23	0.52	0.01
RVS167	RVS167	1.44	0.5	0.01
ARO1	ARO1	1.48	0.44	0.01
EFG1	EFG1	0.99	0.28	0.01
GCN2	GCN2	3.88	3.86	0
PPH21	PPH21	3.88	3.86	0
NEW1	NEW1	6.27	3.45	0
COP1	COP1	6.19	3.01	0
SPO14	SPO14	3.09	2.58	0
FPK1	FPK1	3.09	2.58	0
KEL2	KEL2	3.09	2.58	0
LSM12	LSM12	3.09	2.58	0
BLM10	BLM10	3.09	2.58	0
KOG1	KOG1	3.09	2.58	0
FHL1	FHL1	3.09	2.58	0
GFA1	GFA1	4	2.43	0
NPL3	NPL3	5.41	2.41	0
SPP1	SPP1	2.83	2.4	0
DIN7	DIN7	2.83	2.4	0
ECM32	ECM32	2.83	2.4	0
UTP13	UTP13	4.68	2.4	0
BRE5	BRE5	2.83	2.4	0
YDR186C	YDR186C	2.83	2.4	0
ZUO1	ZUO1	4.71	2.4	0
MRPS28	MRPS28	2.83	2.4	0
SRO7	SRO7	2.83	2.4	0
PAF1	PAF1	2.94	2.23	0
RPS2	RPS2	4.29	2.18	0
TOP1	TOP1	2.69	2.08	0
YOL075C	YOL075C	2.69	2.08	0
QNS1	QNS1	2.69	2.07	0
YEF3	YEF3	3.93	1.96	0
TEF1	TEF1	3.84	1.84	0
GNP1	GNP1	2.56	1.82	0
SBP1	SBP1	4.36	1.81	0
YGR250C	YGR250C	2.66	1.74	0
UTP7	UTP7	2.66	1.74	0
NPR2	NPR2	2.5	1.72	0
MRP51	MRP51	2.5	1.72	0
DLD3	DLD3	2.6	1.65	0
UBI4	UBI4	3.85	1.65	0
CDC55	CDC55	2.44	1.62	0
YGR042W	YGR042W	2.04	1.6	0
ATP16	ATP16	2.04	1.6	0
ATX1	ATX1	2.04	1.6	0
DPH2	DPH2	2.04	1.6	0
NSE1	NSE1	2.04	1.6	0
CIT3	CIT3	2.04	1.6	0
SPO11	SPO11	2.04	1.6	0
SET1	SET1	2.04	1.6	0
MDM38	MDM38	2.04	1.6	0
ECM14	ECM14	2.04	1.6	0
BDH1	BDH1	2.04	1.6	0
MTG1	MTG1	2.04	1.6	0
CYK3	CYK3	2.04	1.6	0
YAT1	YAT1	2.04	1.6	0
BNA5	BNA5	2.04	1.6	0
LTV1	LTV1	2.04	1.6	0
STE5	STE5	2.04	1.6	0
SUI2	SUI2	3.16	1.6	0
FET3	FET3	2.04	1.6	0
RRP7	RRP7	2.04	1.6	0
APC4	APC4	2.04	1.6	0
STU2	STU2	2.04	1.6	0
CDC9	CDC9	2.04	1.6	0
YBR242W	YBR242W	2.04	1.6	0
LEU9	LEU9	2.04	1.6	0
RPL11A	RPL11A	2.04	1.6	0
ARG1	ARG1	2.04	1.6	0
LSB1	LSB1	2.04	1.6	0
PEX5	PEX5	2.04	1.6	0
ARO80	ARO80	2.04	1.6	0
HRK1	HRK1	2.04	1.6	0
YOX1	YOX1	2.04	1.6	0
KIN4	KIN4	2.04	1.6	0
PPH22	PPH22	2.04	1.6	0
SSZ1	SSZ1	3.33	1.59	0
APL6	APL6	2.39	1.55	0
HXK2	HXK2	2.77	1.51	0
HYM1	HYM1	1.79	1.5	0
NTA1	NTA1	1.79	1.5	0
MOB2	MOB2	1.79	1.5	0
SEM1	SEM1	1.79	1.5	0
AIM32	AIM32	1.79	1.5	0
SUL2	SUL2	1.79	1.5	0
SYS1	SYS1	1.79	1.5	0
SQS1	SQS1	1.79	1.5	0
HRD3	HRD3	1.79	1.5	0
APJ1	APJ1	1.79	1.5	0
MPH1	MPH1	1.79	1.5	0
CWC22	CWC22	1.79	1.5	0
YBR287W	YBR287W	1.79	1.5	0
FUI1	FUI1	1.79	1.5	0
GRX1	GRX1	1.79	1.5	0
CTF18	CTF18	1.79	1.5	0
RIM8	RIM8	1.79	1.5	0
CTP1	CTP1	1.79	1.5	0
YFL066C	YFL066C	1.79	1.5	0
ADR1	ADR1	1.79	1.5	0
CBK1	CBK1	1.79	1.5	0
YAP5	YAP5	1.79	1.5	0
PUP3	PUP3	1.79	1.5	0
ACB1	ACB1	1.79	1.5	0
TEP1	TEP1	1.79	1.5	0
BNI4	BNI4	1.79	1.5	0
DDI1	DDI1	1.79	1.5	0
YKR023W	YKR023W	1.79	1.5	0
MIT1	MIT1	1.79	1.5	0
CIN8	CIN8	1.79	1.5	0
MDL2	MDL2	1.79	1.5	0
UTP30	UTP30	1.79	1.5	0
SEC27	SEC27	3.35	1.46	0
TIF34	TIF34	2.96	1.45	0
SEC26	SEC26	2.88	1.44	0
COX6	COX6	2.4	1.44	0
DCW1	DCW1	1.94	1.39	0
LYS9	LYS9	1.94	1.39	0
DUG1	DUG1	1.94	1.39	0
NOP9	NOP9	1.94	1.38	0
OST1	OST1	1.94	1.38	0
DET1	DET1	1.94	1.38	0
NPR3	NPR3	1.94	1.38	0
PTC5	PTC5	1.94	1.38	0
RPL9B	RPL9B	2.46	1.31	0
DCP2	DCP2	1.7	1.3	0
ARD1	ARD1	1.7	1.3	0
SPT23	SPT23	1.7	1.3	0
SEC10	SEC10	1.7	1.29	0
YDR056C	YDR056C	1.7	1.29	0
FAS1	FAS1	2.69	1.28	0
GCN1	GCN1	3.11	1.26	0
LYP1	LYP1	1.68	1.25	0
TCP1	TCP1	2.77	1.24	0
PAA1	PAA1	2.63	1.24	0
CDC42	CDC42	2.69	1.23	0
DED1	DED1	2.47	1.21	0
HEM14	HEM14	1.85	1.21	0
RNA14	RNA14	1.85	1.21	0
UTP6	UTP6	1.85	1.21	0
PNO1	PNO1	2.37	1.17	0
CCT6	CCT6	3.14	1.17	0
SEC63	SEC63	2.39	1.16	0
ATG20	ATG20	1.8	1.15	0
RSC9	RSC9	1.8	1.15	0
PEP12	PEP12	1.8	1.15	0
TBF1	TBF1	1.8	1.15	0
SIP1	SIP1	1.8	1.15	0
TFC1	TFC1	1.8	1.15	0
VAS1	VAS1	2.03	1.14	0
SAP185	SAP185	1.61	1.13	0
HTB1	HTB1	2.43	1.13	0
DBP6	DBP6	1.61	1.13	0
SPT5	SPT5	2.14	1.12	0
EMP70	EMP70	1.95	1.11	0
NOP2	NOP2	2.25	1.1	0
STE6	STE6	2.13	1.09	0
FAB1	FAB1	1.76	1.08	0
RAD1	RAD1	1.76	1.08	0
ZIP1	ZIP1	1.58	1.07	0
MHP1	MHP1	1.58	1.07	0
TCB3	TCB3	2.36	1.06	0
TIF11	TIF11	1.92	1.06	0
RPA190	RPA190	2.49	1.05	0
RPL3	RPL3	1.83	1.04	0
OCA1	OCA1	1.72	1.03	0
HSL1	HSL1	1.72	1.03	0
WHI4	WHI4	1.72	1.03	0
FBA1	FBA1	1.98	1.03	0
NMD3	NMD3	2.12	1.03	0
RPL9A	RPL9A	1.8	1.02	0
SGS1	SGS1	1.54	1.01	0
RHO5	RHO5	1.54	1.01	0
LYS21	LYS21	2.05	1	0
GRX5	GRX5	1.92	0.99	0
PDA1	PDA1	2.05	0.99	0
RIM1	RIM1	2.68	0.98	0
RPC19	RPC19	1.68	0.98	0
SEC21	SEC21	2.1	0.98	0
CIT1	CIT1	1.84	0.97	0
TAF14	TAF14	1.82	0.97	0
UTP20	UTP20	1.51	0.96	0
IMP3	IMP3	1.51	0.96	0
YGR266W	YGR266W	1.51	0.96	0
KRS1	KRS1	1.85	0.95	0
RPT6	RPT6	1.98	0.95	0
TOM40	TOM40	2.47	0.95	0
SPT6	SPT6	1.78	0.93	0
PFK1	PFK1	1.84	0.9	0
MTC5	MTC5	1.62	0.89	0
MSH2	MSH2	1.44	0.87	0
TFG2	TFG2	1.38	0.87	0
FCY2	FCY2	1.44	0.87	0
SLA2	SLA2	2.31	0.87	0
HSM3	HSM3	1.59	0.86	0
AIM14	AIM14	1.59	0.86	0
MRP4	MRP4	1.58	0.85	0
FUS3	FUS3	1.58	0.85	0
GLY1	GLY1	1.96	0.84	0
NST1	NST1	1.41	0.83	0
EPL1	EPL1	1.39	0.8	0
STH1	STH1	1.33	0.8	0
ARC1	ARC1	1.7	0.8	0
FCJ1	FCJ1	1.52	0.79	0
GUS1	GUS1	1.36	0.79	0
PPZ1	PPZ1	1.51	0.78	0
BFR1	BFR1	1.54	0.78	0
MDH1	MDH1	1.51	0.78	0
NUP1	NUP1	1.51	0.78	0
JEM1	JEM1	1.51	0.78	0
SCP160	SCP160	1.23	0.76	0
IPL1	IPL1	1.35	0.76	0
MUM2	MUM2	1.49	0.76	0
NUP188	NUP188	1.35	0.76	0
MEC1	MEC1	2.04	0.75	0
GCD11	GCD11	1.91	0.75	0
MES1	MES1	1.54	0.75	0
TEF4	TEF4	1.57	0.75	0
EBP2	EBP2	1.28	0.75	0
FRS2	FRS2	1.82	0.74	0
CAM1	CAM1	1.66	0.73	0
RSC8	RSC8	1.32	0.73	0
SAC1	SAC1	1.96	0.72	0
RPS22A	RPS22A	1.46	0.72	0
SPT16	SPT16	1.38	0.72	0
EBS1	EBS1	1.32	0.72	0
FUM1	FUM1	1.26	0.71	0
ABF1	ABF1	1.44	0.71	0
CDC14	CDC14	1.3	0.71	0
YDJ1	YDJ1	1.78	0.7	0
ALD6	ALD6	1.48	0.7	0
KTR4	KTR4	1.43	0.7	0
PET9	PET9	1.72	0.7	0
SSB1	SSB1	1.01	0.7	0
DRE2	DRE2	1.23	0.69	0
RPL27A	RPL27A	1.89	0.69	0
TUB3	TUB3	1.47	0.69	0
SSB2	SSB2	1.02	0.69	0
UFD2	UFD2	1.41	0.68	0
RIX1	RIX1	1.41	0.68	0
ETT1	ETT1	1.49	0.68	0
CMS1	CMS1	1.28	0.68	0
NCL1	NCL1	1.42	0.67	0
NAP1	NAP1	1.35	0.67	0
RPG1	RPG1	1.38	0.67	0
STE4	STE4	1.29	0.66	0
NMA111	NMA111	1.26	0.66	0
VMA6	VMA6	1.5	0.66	0
IML1	IML1	1.37	0.65	0
CAF20	CAF20	1.19	0.65	0
DBP2	DBP2	1.73	0.65	0
GCD1	GCD1	1.36	0.64	0
BEM2	BEM2	1.31	0.64	0
UBP1	UBP1	1.23	0.64	0
RPA34	RPA34	1.5	0.64	0
UBP15	UBP15	1.36	0.64	0
DYS1	DYS1	2.06	0.63	0
GCD7	GCD7	1.34	0.62	0
RPN2	RPN2	1.2	0.62	0
ERG11	ERG11	1.97	0.61	0
TIF35	TIF35	1.32	0.61	0
TUB1	TUB1	1.33	0.61	0
RVB2	RVB2	1.33	0.61	0
DIM1	DIM1	1.33	0.6	0
NCP1	NCP1	1.09	0.6	0
RPF2	RPF2	1.11	0.59	0
EFR3	EFR3	1.3	0.59	0
FAS2	FAS2	1.18	0.59	0
DOP1	DOP1	1.17	0.58	0
CYR1	CYR1	1.29	0.58	0
ADH3	ADH3	1.45	0.57	0
UBP3	UBP3	1.32	0.57	0
PAB1	PAB1	1.03	0.57	0
GPD2	GPD2	1.59	0.57	0
RPO31	RPO31	1.15	0.56	0
IDH2	IDH2	1.37	0.56	0
CDC33	CDC33	1.36	0.56	0
SSH1	SSH1	1.19	0.56	0
YGL039W	YGL039W	1.11	0.56	0
RFC1	RFC1	1.13	0.55	0
MLC1	MLC1	1.62	0.55	0
DRS1	DRS1	1.12	0.54	0
VPH1	VPH1	1.16	0.54	0
TRM1	TRM1	1.31	0.52	0
NUP2	NUP2	1.21	0.52	0
KAR2	KAR2	1.05	0.52	0
IMH1	IMH1	1.19	0.51	0
TUM1	TUM1	1.1	0.5	0
DBP1	DBP1	1.48	0.5	0
RNA1	RNA1	0.99	0.49	0
TIF6	TIF6	0.95	0.49	0
YCK2	YCK2	1.17	0.49	0
PDC5	PDC5	0.83	0.49	0
SEC24	SEC24	1.18	0.49	0
PDB1	PDB1	1.38	0.48	0
PGM1	PGM1	1.04	0.48	0
SES1	SES1	1.38	0.47	0
TUB2	TUB2	1.05	0.47	0
VTH1	VTH1	1.12	0.46	0
DID2	DID2	1.44	0.46	0
MGM101	MGM101	1.34	0.46	0
GGA2	GGA2	0.99	0.46	0
RPO21	RPO21	1.2	0.46	0
RPS1B	RPS1B	0.97	0.46	0
RPL2A	RPL2A	1.12	0.45	0
TSA1	TSA1	1.13	0.45	0
MCM5	MCM5	1.14	0.45	0
PRO1	PRO1	0.94	0.44	0
ACT1	ACT1	0.79	0.44	0
SRV2	SRV2	1.04	0.44	0
CCT7	CCT7	1.03	0.44	0
MCA1	MCA1	0.98	0.43	0
MAK21	MAK21	0.94	0.43	0
MCM2	MCM2	0.9	0.43	0
SUP45	SUP45	0.83	0.43	0
GCD6	GCD6	1.06	0.42	0
RHR2	RHR2	1.13	0.42	0
PAN1	PAN1	1.12	0.42	0
RPN12	RPN12	1.24	0.42	0
PGK1	PGK1	1.03	0.42	0
PTR2	PTR2	0.96	0.42	0
NOG2	NOG2	0.7	0.41	0
CDC12	CDC12	0.95	0.41	0
KRE2	KRE2	1.04	0.41	0
ACS2	ACS2	0.74	0.41	0
KES1	KES1	0.97	0.41	0
CCR4	CCR4	1.01	0.41	0
RPT5	RPT5	0.81	0.4	0
UGP1	UGP1	1.12	0.4	0
RPL5	RPL5	0.65	0.39	0
RKR1	RKR1	1.19	0.39	0
ENO2	ENO2	0.88	0.39	0
THS1	THS1	0.83	0.38	0
RPS15	RPS15	0.94	0.38	0
MRT4	MRT4	1.06	0.38	0
KIN1	KIN1	0.96	0.37	0
ENO1	ENO1	0.89	0.36	0
GRS1	GRS1	0.65	0.36	0
ARP3	ARP3	0.78	0.35	0
PFK2	PFK2	0.76	0.35	0
RPL15A	RPL15A	0.8	0.34	0
SSK2	SSK2	0.83	0.34	0
HCR1	HCR1	0.9	0.34	0
YLR257W	YLR257W	0.84	0.34	0
ARX1	ARX1	0.85	0.34	0
CSE1	CSE1	0.84	0.34	0
NOP13	NOP13	0.79	0.34	0
CDC48	CDC48	0.62	0.33	0
MRI1	MRI1	0.8	0.33	0
PEP4	PEP4	0.69	0.33	0
KGD1	KGD1	0.78	0.33	0
FKS1	FKS1	0.83	0.33	0
FUR1	FUR1	1.26	0.33	0
RPT1	RPT1	0.96	0.32	0
SMC1	SMC1	0.8	0.32	0
VMA1	VMA1	0.54	0.32	0
AMD1	AMD1	0.8	0.31	0
UBA1	UBA1	0.78	0.31	0
RPL4A	RPL4A	0.6	0.31	0
URA2	URA2	0.7	0.31	0
PDI1	PDI1	0.55	0.3	0
RPN8	RPN8	1.25	0.3	0
MTR4	MTR4	0.74	0.3	0
RPL25	RPL25	0.63	0.3	0
ARB1	ARB1	0.78	0.3	0
KTI12	KTI12	0.73	0.29	0
RPN9	RPN9	0.69	0.29	0
SUB1	SUB1	0.77	0.29	0
TDH3	TDH3	0.62	0.29	0
YCF1	YCF1	0.72	0.29	0
SUI3	SUI3	0.76	0.29	0
PSA1	PSA1	0.67	0.29	0
MLP1	MLP1	0.72	0.29	0
EFB1	EFB1	0.71	0.29	0
SPA2	SPA2	0.86	0.28	0
CDC60	CDC60	0.49	0.28	0
DED81	DED81	0.73	0.28	0
PDC1	PDC1	0.43	0.28	0
CDC31	CDC31	0.67	0.27	0
IPP1	IPP1	0.66	0.27	0
MYO2	MYO2	0.82	0.27	0
DNF1	DNF1	0.68	0.26	0
RPL17A	RPL17A	0.54	0.26	0
CMD1	CMD1	0.71	0.26	0
ILV3	ILV3	0.54	0.26	0
POR1	POR1	0.59	0.26	0
ADE6	ADE6	0.69	0.26	0
CDC16	CDC16	0.69	0.25	0
RSP5	RSP5	0.62	0.25	0
PMA1	PMA1	0.57	0.25	0
CCT4	CCT4	0.6	0.25	0
NAT1	NAT1	0.63	0.25	0
SSE1	SSE1	0.5	0.25	0
SSA1	SSA1	0.44	0.24	0
PEP1	PEP1	0.69	0.24	0
RNR2	RNR2	0.59	0.24	0
RPP1B	RPP1B	0.62	0.24	0
PTC2	PTC2	0.77	0.24	0
ADO1	ADO1	0.89	0.23	0
SUB2	SUB2	0.44	0.23	0
ERG10	ERG10	0.8	0.23	0
HSC82	HSC82	0.42	0.23	0
RPT4	RPT4	0.59	0.23	0
SAM2	SAM2	0.55	0.23	0
PRS1	PRS1	0.57	0.23	0
RPS4A	RPS4A	0.56	0.22	0
TOM70	TOM70	0.65	0.22	0
SSA2	SSA2	0.4	0.22	0
VPS13	VPS13	0.51	0.22	0
LCD1	LCD1	0.7	0.22	0
GUA1	GUA1	0.57	0.22	0
PRS3	PRS3	0.63	0.22	0
EFT1	EFT1	0.36	0.21	0
SAR1	SAR1	0.49	0.21	0
RPS14A	RPS14A	0.37	0.21	0
GET3	GET3	0.57	0.21	0
ILV2	ILV2	0.51	0.21	0
TIF3	TIF3	0.62	0.21	0
SER33	SER33	0.56	0.21	0
SPN1	SPN1	0.61	0.21	0
CDC19	CDC19	0.41	0.2	0
PGI1	PGI1	0.57	0.2	0
CCT2	CCT2	0.52	0.2	0
ATP2	ATP2	0.38	0.19	0
ARO4	ARO4	0.5	0.19	0
HSP60	HSP60	0.35	0.19	0
GPM1	GPM1	0.46	0.18	0
RRB1	RRB1	0.45	0.18	0
YRA1	YRA1	0.73	0.18	0
PDX1	PDX1	0.55	0.18	0
LYS12	LYS12	0.4	0.17	0
RPS10B	RPS10B	0.52	0.17	0
LEU1	LEU1	0.51	0.17	0
SAM1	SAM1	0.41	0.17	0
CYS3	CYS3	0.56	0.17	0
YHR020W	YHR020W	0.39	0.17	0
GGC1	GGC1	0.47	0.16	0
HYP2	HYP2	0.44	0.16	0
RPS3	RPS3	0.39	0.16	0
SAC6	SAC6	0.54	0.16	0
TAL1	TAL1	0.63	0.16	0
GND1	GND1	0.41	0.16	0
PIL1	PIL1	0.36	0.16	0
FAA1	FAA1	0.48	0.16	0
RPS24A	RPS24A	0.27	0.16	0
TMA19	TMA19	0.55	0.15	0
TDH1	TDH1	0.35	0.15	0
CHC1	CHC1	0.43	0.15	0
HXT3	HXT3	0.47	0.15	0
RNH202	RNH202	0.4	0.14	0
SQT1	SQT1	0.54	0.14	0
BMH1	BMH1	0.33	0.14	0
HMO1	HMO1	0.39	0.14	0
LSC1	LSC1	0.46	0.14	0
ERG6	ERG6	0.59	0.13	0
SSC1	SSC1	0.24	0.13	0
RPL14A	RPL14A	0.32	0.13	0
RPS5	RPS5	0.22	0.13	0
RPL31A	RPL31A	0.36	0.13	0
SEC53	SEC53	0.37	0.13	0
FAA4	FAA4	0.31	0.13	0
ALA1	ALA1	0.37	0.13	0
MMF1	MMF1	0.31	0.12	0
PFK26	PFK26	0.31	0.12	0
CCT3	CCT3	0.31	0.12	0
SEC23	SEC23	0.29	0.12	0
KAP123	KAP123	0.38	0.11	0
OLA1	OLA1	0.28	0.11	0
Q0255	Q0255	0.36	0.11	0
SAH1	SAH1	0.5	0.11	0
ILV1	ILV1	0.31	0.11	0
MTC1	MTC1	0.31	0.11	0
VMA2	VMA2	0.23	0.11	0
LAT1	LAT1	0.45	0.11	0
RVB1	RVB1	0.37	0.11	0
ASC1	ASC1	0.29	0.1	0
MAE1	MAE1	0.25	0.1	0
NUP192	NUP192	0.32	0.1	0
HTS1	HTS1	0.29	0.1	0
CCT8	CCT8	0.2	0.1	0
YNL208W	YNL208W	0.24	0.09	0
RPN5	RPN5	0.25	0.09	0
SSA4	SSA4	0.2	0.09	0
TDH2	TDH2	0.19	0.09	0
RPT2	RPT2	0.41	0.09	0
RPL7A	RPL7A	0.32	0.09	0
TIF1	TIF1	0.17	0.09	0
PRT1	PRT1	0.24	0.09	0
RPS12	RPS12	0.39	0.09	0
GLT1	GLT1	0.19	0.08	0
RPL30	RPL30	0.14	0.08	0
RNR1	RNR1	0.22	0.08	0
RPL19A	RPL19A	0.14	0.08	0
TPI1	TPI1	0.34	0.08	0
RPP2A	RPP2A	0.21	0.08	0
DPS1	DPS1	0.2	0.08	0
RPL8B	RPL8B	0.19	0.08	0
RPL8A	RPL8A	0.18	0.08	0
CCT5	CCT5	0.26	0.08	0
RPS26A	RPS26A	0.21	0.08	0
RPN1	RPN1	0.28	0.07	0
SSA3	SSA3	0.16	0.07	0
RPL16A	RPL16A	0.21	0.07	0
FOL2	FOL2	0.22	0.07	0
ILS1	ILS1	0.22	0.07	0
RPS7B	RPS7B	0.15	0.07	0
RTF1	RTF1	0.34	0.06	0
RPL38	RPL38	0.14	0.06	0
RPL10	RPL10	0.16	0.06	0
RNR4	RNR4	0.14	0.06	0
SEC4	SEC4	0.14	0.06	0
RPP0	RPP0	0.11	0.05	0
RPS28B	RPS28B	0.12	0.05	0
VPS1	VPS1	0.17	0.05	0
ATP1	ATP1	0.13	0.05	0
CYS4	CYS4	0.18	0.05	0
RPS7A	RPS7A	0.13	0.05	0
GVP36	GVP36	0.12	0.05	0
ECM10	ECM10	0.12	0.04	0
RPL32	RPL32	0.11	0.04	0
RPS9B	RPS9B	0.25	0.04	0
HSP104	HSP104	0.14	0.04	0
YPT31	YPT31	0.11	0.04	0
RPP2B	RPP2B	0.07	0.04	0
YPT1	YPT1	0.12	0.04	0
RPL35A	RPL35A	0.08	0.03	0
RPL22A	RPL22A	0.13	0.03	0
ATP3	ATP3	0.07	0.03	0
ADE5_7	ADE5_7	0.08	0.03	0
RPL16B	RPL16B	0.06	0.02	0
RPS13	RPS13	0.05	0.02	0
YPT7	YPT7	0.06	0.02	0
RPS0A	RPS0A	0.06	0.02	0
TUF1	TUF1	0.02	0.01	0
RPL18A	RPL18A	0.03	0.01	0
CPR3	CPR3	0	0	0
PRP2	PRP2	0	0	0
END3	END3	0	0	0
PAC2	PAC2	0	0	0
SHR3	SHR3	0	0	0
HSP42	HSP42	0	0	0
GSC2	GSC2	0	0	0
BSD2	BSD2	0	0	0
IVY1	IVY1	0	0	0
SCL1	SCL1	0	0	0
ARC35	ARC35	0	0	0
ATP15	ATP15	0	0	0
ATP14	ATP14	0	0	0
ATP12	ATP12	0	0	0
ATP11	ATP11	0	0	0
ATP10	ATP10	0	0	0
BEM4	BEM4	0	0	0
AIM36	AIM36	0	0	0
PRP5	PRP5	0	0	0
POM152	POM152	0	0	0
YDR090C	YDR090C	0	0	0
RGI1	RGI1	0	0	0
SUA7	SUA7	0	0	0
YIL108W	YIL108W	0	0	0
SSP1	SSP1	0	0	0
NSL1	NSL1	0	0	0
YGR111W	YGR111W	0	0	0
ERG1	ERG1	0	0	0
ERG3	ERG3	0	0	0
ERG8	ERG8	0	0	0
ERG9	ERG9	0	0	0
EDC3	EDC3	0	0	0
YGR126W	YGR126W	0	0	0
RRI1	RRI1	0	0	0
SIW14	SIW14	0	0	0
TMN2	TMN2	0	0	0
PKC1	PKC1	0	0	0
GIS2	GIS2	0	0	0
ASM4	ASM4	0	0	0
PAM16	PAM16	0	0	0
VBA4	VBA4	0	0	0
CPR8	CPR8	0	0	0
DSE4	DSE4	0	0	0
CPR6	CPR6	0	0	0
CPR5	CPR5	0	0	0
PAM18	PAM18	0	0	0
YET2	YET2	0	0	0
YET3	YET3	0	0	0
YET1	YET1	0	0	0
TSC10	TSC10	0	0	0
PDR16	PDR16	0	0	0
PDR17	PDR17	0	0	0
PDR11	PDR11	0	0	0
PDR12	PDR12	0	0	0
YVH1	YVH1	0	0	0
RMD1	RMD1	0	0	0
UTP25	UTP25	0	0	0
UTP23	UTP23	0	0	0
BCY1	BCY1	0	0	0
YNR021W	YNR021W	0	0	0
LAA1	LAA1	0	0	0
NUP133	NUP133	0	0	0
IPI3	IPI3	0	0	0
TAE1	TAE1	0	0	0
ARF2	ARF2	0	0	0
ARF1	ARF1	0.01	0	0
IMP2_P	IMP2_P	0	0	0
ATE1	ATE1	0	0	0
BUD20	BUD20	0	0	0
BUD27	BUD27	0	0	0
PSY4	PSY4	0	0	0
SPC105	SPC105	0	0	0
YOR283W	YOR283W	0	0	0
YPR084W	YPR084W	0	0	0
DID4	DID4	0	0	0
YBR096W	YBR096W	0	0	0
YKL033W_A	YKL033W_A	0	0	0
SYP1	SYP1	0	0	0
RLP24	RLP24	0	0	0
SBE2	SBE2	0	0	0
SHE10	SHE10	0	0	0
CAF120	CAF120	0	0	0
SMD2	SMD2	0	0	0
RPC53	RPC53	0	0	0
SCO1	SCO1	0	0	0
MRL1	MRL1	0	0	0
PEX11	PEX11	0	0	0
STE12	STE12	0	0	0
STE13	STE13	0	0	0
YPR010C_A	YPR010C_A	0	0	0
HMI1	HMI1	0	0	0
STE18	STE18	0	0	0
SMC2	SMC2	0	0	0
SRN2	SRN2	0	0	0
TRS85	TRS85	0	0	0
ABP140	ABP140	0	0	0
YCR087C_A	YCR087C_A	0	0	0
RPL15B	RPL15B	0	0	0
YKE2	YKE2	0	0	0
YLR361C_A	YLR361C_A	0	0	0
MCM10	MCM10	0	0	0
YML28	YML28	0	0	0
YML24	YML24	0	0	0
YML27	YML27	0	0	0
UME1	UME1	0	0	0
SPC98	SPC98	0	0	0
URK1	URK1	0	0	0
VMA22	VMA22	0	0	0
FRD1	FRD1	0	0	0
CGI121	CGI121	0	0	0
ANB1	ANB1	0	0	0
YJR011C	YJR011C	0	0	0
FAR11	FAR11	0	0	0
GPT2	GPT2	0	0	0
MOT2	MOT2	0	0	0
HSV2	HSV2	0	0	0
FAR1	FAR1	0	0	0
SGN1	SGN1	0	0	0
RPL33B	RPL33B	0	0	0
FAR8	FAR8	0	0	0
RPL33A	RPL33A	0	0	0
RPN3	RPN3	0	0	0
RPN6	RPN6	0	0	0
RPN7	RPN7	0	0	0
YBR056W	YBR056W	0	0	0
SNA2	SNA2	0	0	0
SNA3	SNA3	0	0	0
SWD2	SWD2	0	0	0
HFA1	HFA1	0	0	0
GDH2	GDH2	0	0	0
YDR333C	YDR333C	0	0	0
DAK1	DAK1	0	0	0
MRP49	MRP49	0	0	0
UFD1	UFD1	0	0	0
ZIP2	ZIP2	0	0	0
YHM2	YHM2	0	0	0
FKH1	FKH1	0	0	0
MSS18	MSS18	0	0	0
FKH2	FKH2	0	0	0
POL12	POL12	0	0	0
AST1	AST1	0	0	0
NRK1	NRK1	0	0	0
EMP24	EMP24	0	0	0
MSB3	MSB3	0	0	0
ERG7	ERG7	0	0	0
MFM1	MFM1	0	0	0
NUP82	NUP82	0	0	0
TIM9	TIM9	0	0	0
PRO3	PRO3	0	0	0
RKI1	RKI1	0	0	0
LCB1	LCB1	0	0	0
YKL077W	YKL077W	0	0	0
LCB2	LCB2	0	0	0
VTI1	VTI1	0	0	0
AIM21	AIM21	0	0	0
MED4	MED4	0	0	0
ARC40	ARC40	0	0	0
MED8	MED8	0	0	0
SLC1	SLC1	0	0	0
YML6	YML6	0	0	0
ECM33	ECM33	0	0	0
SSQ1	SSQ1	0	0	0
YJL070C	YJL070C	0	0	0
MVP1	MVP1	0	0	0
FCY22	FCY22	0	0	0
NDI1	NDI1	0	0	0
HSK3	HSK3	0	0	0
LRS4	LRS4	0	0	0
ISW1	ISW1	0	0	0
ISW2	ISW2	0	0	0
TPS1	TPS1	0	0	0
TPS3	TPS3	0	0	0
TPS2	TPS2	0	0	0
EIS1	EIS1	0	0	0
GAS1	GAS1	0	0	0
GAS3	GAS3	0	0	0
GAS5	GAS5	0	0	0
ARG7	ARG7	0	0	0
ERG5	ERG5	0	0	0
RSM23	RSM23	0	0	0
RSM25	RSM25	0	0	0
RSM24	RSM24	0	0	0
RSM27	RSM27	0	0	0
RBA50	RBA50	0	0	0
BET3	BET3	0	0	0
UIP3	UIP3	0	0	0
BET1	BET1	0	0	0
NUP60	NUP60	0	0	0
BET4	BET4	0	0	0
TOS2	TOS2	0	0	0
TPM2	TPM2	0	0	0
TPM1	TPM1	0	0	0
UTP11	UTP11	0	0	0
UTP14	UTP14	0	0	0
NUP100	NUP100	0	0	0
NTF2	NTF2	0	0	0
SFT2	SFT2	0	0	0
YKT6	YKT6	0	0	0
YHR086W_A	YHR086W_A	0	0	0
YBT1	YBT1	0	0	0
NPA3	NPA3	0	0	0
FMS1	FMS1	0	0	0
BUD14	BUD14	0	0	0
DYN2	DYN2	0	0	0
DYN1	DYN1	0	0	0
SDS24	SDS24	0	0	0
WHI3	WHI3	0	0	0
PSR1	PSR1	0	0	0
SAS4	SAS4	0	0	0
AIR1	AIR1	0	0	0
YLL032C	YLL032C	0	0	0
TPK3	TPK3	0	0	0
TVP23	TVP23	0	0	0
SKI8	SKI8	0	0	0
CCC1	CCC1	0	0	0
SKI3	SKI3	0	0	0
YMR178W	YMR178W	0	0	0
ULP1	ULP1	0	0	0
PIS1	PIS1	0	0	0
OST2	OST2	0	0	0
CDC53	CDC53	0	0	0
GIS1	GIS1	0	0	0
SKG3	SKG3	0	0	0
SKG1	SKG1	0	0	0
NCE102	NCE102	0	0	0
MRK1	MRK1	0	0	0
VHS3	VHS3	0	0	0
VHS1	VHS1	0	0	0
GIS4	GIS4	0	0	0
SMF1	SMF1	0	0	0
DPH5	DPH5	0	0	0
DPH6	DPH6	0	0	0
RDI1	RDI1	0	0	0
STM1	STM1	0	0	0
ERG12	ERG12	0	0	0
ERG13	ERG13	0	0	0
MED2	MED2	0	0	0
YML38	YML38	0	0	0
PRP22	PRP22	0	0	0
YML35	YML35	0	0	0
UTR1	UTR1	0	0	0
PRP28	PRP28	0	0	0
TKL1	TKL1	0	0	0
UTR2	UTR2	0	0	0
POL31	POL31	0	0	0
YJL055W	YJL055W	0	0	0
NDC1	NDC1	0	0	0
PSD2	PSD2	0	0	0
ADD37	ADD37	0	0	0
PAM17	PAM17	0	0	0
GLO2	GLO2	0	0	0
GLO3	GLO3	0	0	0
FLC2	FLC2	0	0	0
CPR7	CPR7	0	0	0
THR4	THR4	0	0	0
ISD11	ISD11	0	0	0
GPA2	GPA2	0	0	0
TIM23	TIM23	0	0	0
THR1	THR1	0	0	0
SOL2	SOL2	0	0	0
HIF1	HIF1	0	0	0
NSE3	NSE3	0	0	0
ENT1	ENT1	0	0	0
ENT3	ENT3	0	0	0
ENT2	ENT2	0	0	0
ENT5	ENT5	0	0	0
AAP1	AAP1	0	0	0
RPL14B	RPL14B	0	0	0
HIT1	HIT1	0	0	0
PFY1	PFY1	0	0	0
YKL050C	YKL050C	0	0	0
YEN1	YEN1	0	0	0
GDB1	GDB1	0	0	0
MSC1	MSC1	0	0	0
MSC2	MSC2	0	0	0
MSC7	MSC7	0	0	0
MSC6	MSC6	0	0	0
RIM20	RIM20	0	0	0
CFT1	CFT1	0	0	0
MXR1	MXR1	0	0	0
TRX2	TRX2	0	0	0
TRX1	TRX1	0	0	0
PHO5	PHO5	0	0	0
CHA4	CHA4	0	0	0
AYR1	AYR1	0	0	0
PHO8	PHO8	0	0	0
RAD50	RAD50	0	0	0
GID8	GID8	0	0	0
VAC7	VAC7	0	0	0
YNL011C	YNL011C	0	0	0
RNP1	RNP1	0	0	0
YKL169C	YKL169C	0	0	0
ECM25	ECM25	0	0	0
SSN8	SSN8	0	0	0
ZPR1	ZPR1	0	0	0
ECM21	ECM21	0	0	0
CSL4	CSL4	0	0	0
RPP1	RPP1	0	0	0
YDR444W	YDR444W	0	0	0
RIA1	RIA1	0	0	0
YPR114W	YPR114W	0	0	0
NAM8	NAM8	0	0	0
EDE1	EDE1	0	0	0
MCX1	MCX1	0	0	0
ADI1	ADI1	0	0	0
DEF1	DEF1	0	0	0
MSH1	MSH1	0	0	0
CSM1	CSM1	0	0	0
GCV1	GCV1	0	0	0
GCV2	GCV2	0	0	0
GCV3	GCV3	0	0	0
RMD9	RMD9	0	0	0
RAM1	RAM1	0	0	0
FRE4	FRE4	0	0	0
TOM71	TOM71	0	0	0
TOR2	TOR2	0	0	0
PYC2	PYC2	0	0	0
TRS130	TRS130	0	0	0
NUP57	NUP57	0	0	0
BUL2	BUL2	0	0	0
HRT1	HRT1	0	0	0
RTK1	RTK1	0	0	0
DJP1	DJP1	0	0	0
VBA3	VBA3	0	0	0
ALP1	ALP1	0	0	0
HHO1	HHO1	0	0	0
NUP116	NUP116	0	0	0
YMR226C	YMR226C	0	0	0
ECM3	ECM3	0	0	0
ECM1	ECM1	0	0	0
PEX19	PEX19	0	0	0
YGR035W_A	YGR035W_A	0	0	0
NIP7	NIP7	0	0	0
SPT15	SPT15	0	0	0
PEX13	PEX13	0	0	0
RPL29	RPL29	0	0	0
RPL28	RPL28	0	0	0
LYS20	LYS20	0	0	0
ATG3	ATG3	0	0	0
AVT7	AVT7	0	0	0
AVT3	AVT3	0	0	0
AVT2	AVT2	0	0	0
SNF12	SNF12	0	0	0
VMS1	VMS1	0	0	0
TAH11	TAH11	0	0	0
JJJ2	JJJ2	0	0	0
JJJ3	JJJ3	0	0	0
TAH18	TAH18	0	0	0
PGA3	PGA3	0	0	0
YIL156W_B	YIL156W_B	0	0	0
VAR1	VAR1	0	0	0
GLC3	GLC3	0	0	0
DNF2	DNF2	0	0	0
DNF3	DNF3	0	0	0
SMF3	SMF3	0	0	0
WBP1	WBP1	0	0	0
LEM3	LEM3	0	0	0
SPP41	SPP41	0	0	0
PBY1	PBY1	0	0	0
RPS29A	RPS29A	0	0	0
HMG1	HMG1	0	0	0
HMG2	HMG2	0	0	0
VID30	VID30	0	0	0
DOG2	DOG2	0	0	0
ATG21	ATG21	0	0	0
ERG20	ERG20	0	0	0
ERG27	ERG27	0	0	0
ERG26	ERG26	0	0	0
ALB1	ALB1	0	0	0
ERG28	ERG28	0	0	0
HCA4	HCA4	0	0	0
TYS1	TYS1	0	0	0
MRPS9	MRPS9	0	0	0
MRPS8	MRPS8	0	0	0
RPO41	RPO41	0	0	0
MRPS5	MRPS5	0	0	0
MRPS2	MRPS2	0	0	0
ADH4	ADH4	0	0	0
UBR1	UBR1	0	0	0
TWF1	TWF1	0	0	0
YML3	YML3	0	0	0
TMA16	TMA16	0	0	0
SNQ2	SNQ2	0	0	0
DRS2	DRS2	0	0	0
RPS18B	RPS18B	0	0	0
FAT1	FAT1	0	0	0
VPS74	VPS74	0	0	0
RPL31B	RPL31B	0	0	0
VPS70	VPS70	0	0	0
GLN4	GLN4	0	0	0
SNC2	SNC2	0	0	0
PCM1	PCM1	0	0	0
DFM1	DFM1	0	0	0
RSC30	RSC30	0	0	0
BRE1	BRE1	0	0	0
EMW1	EMW1	0	0	0
RHO3	RHO3	0	0	0
RHO2	RHO2	0	0	0
RHO1	RHO1	0	0	0
SIZ1	SIZ1	0	0	0
RXT2	RXT2	0	0	0
RXT3	RXT3	0	0	0
CAP2	CAP2	0	0	0
OAF3	OAF3	0	0	0
OAF1	OAF1	0	0	0
SRB8	SRB8	0	0	0
SRB5	SRB5	0	0	0
SRB7	SRB7	0	0	0
SRB6	SRB6	0	0	0
SRB2	SRB2	0	0	0
RRF1	RRF1	0	0	0
RPS16B	RPS16B	0	0	0
RCN2	RCN2	0	0	0
HYR1	HYR1	0	0	0
RPS16A	RPS16A	0	0	0
MBP1	MBP1	0	0	0
HDA1	HDA1	0	0	0
LSM1	LSM1	0	0	0
LSM2	LSM2	0	0	0
ACO1	ACO1	0	0	0
FYV8	FYV8	0	0	0
ACO2	ACO2	0	0	0
GLN1	GLN1	0	0	0
SPC29	SPC29	0	0	0
YPR003C	YPR003C	0	0	0
GDA1	GDA1	0	0	0
MET7	MET7	0	0	0
MET4	MET4	0	0	0
MET5	MET5	0	0	0
CTI6	CTI6	0	0	0
SEY1	SEY1	0	0	0
SUR2	SUR2	0	0	0
YFH1	YFH1	0	0	0
VPS72	VPS72	0	0	0
CIR2	CIR2	0	0	0
CIR1	CIR1	0	0	0
MSN4	MSN4	0	0	0
SMC5	SMC5	0	0	0
GSF2	GSF2	0	0	0
CBC2	CBC2	0	0	0
AIM41	AIM41	0	0	0
MHF1	MHF1	0	0	0
AIM45	AIM45	0	0	0
SMC6	SMC6	0	0	0
MGE1	MGE1	0	0	0
ECM19	ECM19	0	0	0
SWH1	SWH1	0	0	0
GPN3	GPN3	0	0	0
COR1	COR1	0	0	0
MSS51	MSS51	0	0	0
PAT1	PAT1	0	0	0
NSA1	NSA1	0	0	0
RRD1	RRD1	0	0	0
GGA1	GGA1	0	0	0
USO1	USO1	0	0	0
EMI1	EMI1	0	0	0
EMI2	EMI2	0	0	0
YGL041W_A	YGL041W_A	0	0	0
ADH1	ADH1	0	0	0
ADH6	ADH6	0	0	0
ADH5	ADH5	0	0	0
PAR32	PAR32	0	0	0
PRM4	PRM4	0	0	0
EST2	EST2	0	0	0
PHO11	PHO11	0	0	0
FEN1	FEN1	0	0	0
PRM9	PRM9	0	0	0
SDH1	SDH1	0	0	0
SDH3	SDH3	0	0	0
SDH2	SDH2	0	0	0
JSN1	JSN1	0	0	0
TPO5	TPO5	0	0	0
AIM13	AIM13	0	0	0
TPO3	TPO3	0	0	0
SHO1	SHO1	0	0	0
NUP49	NUP49	0	0	0
YTA6	YTA6	0	0	0
NUP42	NUP42	0	0	0
FMC1	FMC1	0	0	0
DLT1	DLT1	0	0	0
BCD1	BCD1	0	0	0
HOP	HOP	0	0	0
ZIM17	ZIM17	0	0	0
SUP35	SUP35	0	0	0
DIS3	DIS3	0	0	0
EMG1	EMG1	0	0	0
KGD2	KGD2	0	0	0
RTT103	RTT103	0	0	0
ATF1	ATF1	0	0	0
RTT106	RTT106	0	0	0
PST2	PST2	0	0	0
VMR1	VMR1	0	0	0
AKL1	AKL1	0	0	0
ABP1	ABP1	0	0	0
YKR070W	YKR070W	0	0	0
CAP1	CAP1	0	0	0
RAS2	RAS2	0	0	0
DIA4	DIA4	0	0	0
DIA2	DIA2	0	0	0
RPS19B	RPS19B	0	0	0
SRS2	SRS2	0	0	0
NPR1	NPR1	0	0	0
PUF6	PUF6	0	0	0
PUF3	PUF3	0	0	0
PUF2	PUF2	0	0	0
HTZ1	HTZ1	0	0	0
TRM112	TRM112	0	0	0
HMF1	HMF1	0	0	0
RBG2	RBG2	0	0	0
UBC1	UBC1	0	0	0
UBC6	UBC6	0	0	0
UBC7	UBC7	0	0	0
RIM15	RIM15	0	0	0
SHS1	SHS1	0	0	0
PEX25	PEX25	0	0	0
RPS17A	RPS17A	0	0	0
NFU1	NFU1	0	0	0
RPS17B	RPS17B	0	0	0
RAV1	RAV1	0	0	0
IZH2	IZH2	0	0	0
VPH2	VPH2	0	0	0
ERV41	ERV41	0	0	0
ALO1	ALO1	0	0	0
ERV46	ERV46	0	0	0
SOG2	SOG2	0	0	0
HHT1	HHT1	0	0	0
HHT2	HHT2	0	0	0
RPL17B	RPL17B	0	0	0
YNL010W	YNL010W	0	0	0
YMR134W	YMR134W	0	0	0
GAC1	GAC1	0	0	0
ABF2	ABF2	0	0	0
PMT2	PMT2	0	0	0
NGR1	NGR1	0	0	0
TRM3	TRM3	0	0	0
PEP8	PEP8	0	0	0
PSH1	PSH1	0	0	0
BRF1	BRF1	0	0	0
PEP5	PEP5	0	0	0
MTW1	MTW1	0	0	0
YMR102C	YMR102C	0	0	0
PCT1	PCT1	0	0	0
HFD1	HFD1	0	0	0
RSC1	RSC1	0	0	0
RSC2	RSC2	0	0	0
RSC3	RSC3	0	0	0
RSC4	RSC4	0	0	0
YML11	YML11	0	0	0
RSC6	RSC6	0	0	0
YML13	YML13	0	0	0
YML19	YML19	0	0	0
RRP14	RRP14	0	0	0
SSP120	SSP120	0	0	0
ACP1	ACP1	0	0	0
AHA1	AHA1	0	0	0
YCR016W	YCR016W	0	0	0
CBP6	CBP6	0	0	0
PAH1	PAH1	0	0	0
CBP2	CBP2	0	0	0
MEU1	MEU1	0	0	0
RDS3	RDS3	0	0	0
PEX1	PEX1	0	0	0
CTF4	CTF4	0	0	0
RIF1	RIF1	0	0	0
YMR074C	YMR074C	0	0	0
CIS3	CIS3	0	0	0
SCH9	SCH9	0	0	0
SET5	SET5	0	0	0
SET2	SET2	0	0	0
SET3	SET3	0	0	0
RNR3	RNR3	0	0	0
CMK1	CMK1	0	0	0
CMK2	CMK2	0	0	0
TIP20	TIP20	0	0	0
YMR010W	YMR010W	0	0	0
SOL1	SOL1	0	0	0
NAB2	NAB2	0	0	0
YML082W	YML082W	0	0	0
COS6	COS6	0	0	0
PEX8	PEX8	0	0	0
YSC84	YSC84	0	0	0
SWI6	SWI6	0	0	0
SWI1	SWI1	0	0	0
COS9	COS9	0	0	0
COS8	COS8	0	0	0
RGC1	RGC1	0	0	0
RPS9A	RPS9A	0	0	0
EPS1	EPS1	0	0	0
GCR2	GCR2	0	0	0
RNH203	RNH203	0	0	0
FDC1	FDC1	0	0	0
SUR4	SUR4	0	0	0
ADK1	ADK1	0	0	0
NEO1	NEO1	0	0	0
HSP82	HSP82	0	0	0
FPR1	FPR1	0	0	0
FPR2	FPR2	0	0	0
ADE4	ADE4	0	0	0
SPF1	SPF1	0	0	0
ADE1	ADE1	0	0	0
ADE2	ADE2	0	0	0
ADE3	ADE3	0	0	0
TDA3	TDA3	0	0	0
ROT2	ROT2	0	0	0
TFG1	TFG1	0	0	0
HSP150	HSP150	0	0	0
PMU1	PMU1	0	0	0
DSS1	DSS1	0	0	0
LTO1	LTO1	0	0	0
HSL7	HSL7	0	0	0
YJR111C	YJR111C	0	0	0
GIP3	GIP3	0	0	0
ITC1	ITC1	0	0	0
AKR1	AKR1	0	0	0
KIC1	KIC1	0	0	0
PEX30	PEX30	0	0	0
NTE1	NTE1	0	0	0
WTM1	WTM1	0	0	0
QCR7	QCR7	0	0	0
RTG1	RTG1	0	0	0
YTA12	YTA12	0	0	0
BAS1	BAS1	0	0	0
MMS1	MMS1	0	0	0
RSM10	RSM10	0	0	0
YGR017W	YGR017W	0	0	0
RSM19	RSM19	0	0	0
LAP3	LAP3	0	0	0
FAD1	FAD1	0	0	0
APD1	APD1	0	0	0
PGC1	PGC1	0	0	0
PCS60	PCS60	0	0	0
GUK1	GUK1	0	0	0
PIK1	PIK1	0	0	0
NMT1	NMT1	0	0	0
ERP4	ERP4	0	0	0
AYT1	AYT1	0	0	0
SYT1	SYT1	0	0	0
PBI2	PBI2	0	0	0
AFG1	AFG1	0	0	0
AFG3	AFG3	0	0	0
SPT8	SPT8	0	0	0
SPT7	SPT7	0	0	0
RPL37B	RPL37B	0	0	0
RPL37A	RPL37A	0	0	0
ANP1	ANP1	0	0	0
MOS2	MOS2	0	0	0
SDS3	SDS3	0	0	0
YPR172W	YPR172W	0	0	0
BZZ1	BZZ1	0	0	0
HCH1	HCH1	0	0	0
NBL1	NBL1	0	0	0
NKP1	NKP1	0	0	0
NKP2	NKP2	0	0	0
WRS1	WRS1	0	0	0
HEM3	HEM3	0	0	0
BEM3	BEM3	0	0	0
RPL20B	RPL20B	0	0	0
COG6	COG6	0	0	0
UBP2	UBP2	0	0	0
PRP19	PRP19	0	0	0
UBP6	UBP6	0	0	0
PRP16	PRP16	0	0	0
SGM1	SGM1	0	0	0
RPL43B	RPL43B	0	0	0
ARG5_6	ARG5_6	0	0	0
SSO1	SSO1	0	0	0
PSY2	PSY2	0	0	0
PEA2	PEA2	0	0	0
MDM35	MDM35	0	0	0
MRH1	MRH1	0	0	0
DUO1	DUO1	0	0	0
VPS51	VPS51	0	0	0
MAK31	MAK31	0	0	0
YEL043W	YEL043W	0	0	0
MDR1	MDR1	0	0	0
PLB1	PLB1	0	0	0
RPB9	RPB9	0	0	0
PSK2	PSK2	0	0	0
PSK1	PSK1	0	0	0
SKP1	SKP1	0	0	0
CAR2	CAR2	0	0	0
CAR1	CAR1	0	0	0
FIP1	FIP1	0	0	0
CCZ1	CCZ1	0	0	0
WHI2	WHI2	0	0	0
MNN9	MNN9	0	0	0
ELO1	ELO1	0	0	0
MNN2	MNN2	0	0	0
MNN1	MNN1	0	0	0
MNN5	MNN5	0	0	0
MSE1	MSE1	0	0	0
YIM1	YIM1	0	0	0
FMP52	FMP52	0	0	0
PHB2	PHB2	0	0	0
MIA40	MIA40	0	0	0
PHB1	PHB1	0	0	0
MSH6	MSH6	0	0	0
CTF8	CTF8	0	0	0
BUD7	BUD7	0	0	0
RRT6	RRT6	0	0	0
ATG17	ATG17	0	0	0
HBS1	HBS1	0	0	0
PSE1	PSE1	0	0	0
IDS2	IDS2	0	0	0
BUD4	BUD4	0	0	0
SUN4	SUN4	0	0	0
RLI1	RLI1	0	0	0
OSH2	OSH2	0	0	0
SLM1	SLM1	0	0	0
TCB1	TCB1	0	0	0
TCB2	TCB2	0	0	0
AZF1	AZF1	0	0	0
PPS1	PPS1	0	0	0
PRK1	PRK1	0	0	0
HOG1	HOG1	0	0	0
CIK1	CIK1	0	0	0
ACC1	ACC1	0	0	0
SPE4	SPE4	0	0	0
YML108W	YML108W	0	0	0
PMT4	PMT4	0	0	0
PMT7	PMT7	0	0	0
PMT1	PMT1	0	0	0
TOM22	TOM22	0	0	0
TOM20	TOM20	0	0	0
TRM5	TRM5	0	0	0
RPL1B	RPL1B	0	0	0
TRM9	TRM9	0	0	0
SHM2	SHM2	0	0	0
SHM1	SHM1	0	0	0
VTC4	VTC4	0	0	0
VTC3	VTC3	0	0	0
VTC2	VTC2	0	0	0
GTB1	GTB1	0	0	0
TIM44	TIM44	0	0	0
YOS9	YOS9	0	0	0
YTM1	YTM1	0	0	0
TGL5	TGL5	0	0	0
TGL4	TGL4	0	0	0
IDH1	IDH1	0	0	0
RPS8B	RPS8B	0	0	0
ARI1	ARI1	0	0	0
ERP1	ERP1	0	0	0
YNR048W	YNR048W	0	0	0
ERP3	ERP3	0	0	0
GEA2	GEA2	0	0	0
GEA1	GEA1	0	0	0
MMS22	MMS22	0	0	0
DSE3	DSE3	0	0	0
RTS3	RTS3	0	0	0
BDF1	BDF1	0	0	0
RTS2	RTS2	0	0	0
RGP1	RGP1	0	0	0
MIR1	MIR1	0	0	0
RSM7	RSM7	0	0	0
MKT1	MKT1	0	0	0
HGH1	HGH1	0	0	0
MTR2	MTR2	0	0	0
TSA2	TSA2	0	0	0
SLM4	SLM4	0	0	0
YPT52	YPT52	0	0	0
SBH2	SBH2	0	0	0
CDC10	CDC10	0	0	0
ROY1	ROY1	0	0	0
OSH6	OSH6	0	0	0
OSH7	OSH7	0	0	0
FCP1	FCP1	0	0	0
NUP145	NUP145	0	0	0
SFP1	SFP1	0	0	0
YLR063W	YLR063W	0	0	0
SYG1	SYG1	0	0	0
NPP1	NPP1	0	0	0
CLC1	CLC1	0	0	0
UBA4	UBA4	0	0	0
UBA2	UBA2	0	0	0
ATG18	ATG18	0	0	0
PWP2	PWP2	0	0	0
TRS31	TRS31	0	0	0
TRS33	TRS33	0	0	0
STI1	STI1	0	0	0
NTH1	NTH1	0	0	0
HEL2	HEL2	0	0	0
TDA2	TDA2	0	0	0
YPL216W	YPL216W	0	0	0
TEL1	TEL1	0	0	0
YOR223W	YOR223W	0	0	0
YDR061W	YDR061W	0	0	0
ATG19	ATG19	0	0	0
RBS1	RBS1	0	0	0
ABD1	ABD1	0	0	0
VPS45	VPS45	0	0	0
DOA4	DOA4	0	0	0
GLC7	GLC7	0	0	0
MTG2	MTG2	0	0	0
YOR131C	YOR131C	0	0	0
RPC82	RPC82	0	0	0
RPL36A	RPL36A	0	0	0
RPL36B	RPL36B	0	0	0
PXR1	PXR1	0	0	0
SNL1	SNL1	0	0	0
aI2	aI2	0	0	0
ASG1	ASG1	0	0	0
YML002W	YML002W	0	0	0
RHB1	RHB1	0	0	0
EGD2	EGD2	0	0	0
KSS1	KSS1	0	0	0
CNS1	CNS1	0	0	0
PPR1	PPR1	0	0	0
YMR090W	YMR090W	0	0	0
FIS1	FIS1	0	0	0
HXT2	HXT2	0	0	0
YPQ1	YPQ1	0	0	0
RSA4	RSA4	0	0	0
BNA4	BNA4	0	0	0
RPL21A	RPL21A	0	0	0
BNA1	BNA1	0	0	0
RPL21B	RPL21B	0	0	0
YOL073C	YOL073C	0	0	0
RCK2	RCK2	0	0	0
NUT2	NUT2	0	0	0
NUT1	NUT1	0	0	0
AHC2	AHC2	0	0	0
AHC1	AHC1	0	0	0
NPL6	NPL6	0	0	0
NPL4	NPL4	0	0	0
RVS161	RVS161	0	0	0
DAD3	DAD3	0	0	0
PAN3	PAN3	0	0	0
SED5	SED5	0	0	0
PAN6	PAN6	0	0	0
VIP1	VIP1	0	0	0
CBR1	CBR1	0	0	0
UTH1	UTH1	0	0	0
ARO10	ARO10	0	0	0
GDT1	GDT1	0	0	0
RNT1	RNT1	0	0	0
NSP1	NSP1	0	0	0
GTS1	GTS1	0	0	0
MSI1	MSI1	0	0	0
HEM13	HEM13	0	0	0
HEM15	HEM15	0	0	0
MCM6	MCM6	0	0	0
MCM4	MCM4	0	0	0
CKI1	CKI1	0	0	0
REC8	REC8	0	0	0
COQ8	COQ8	0	0	0
COQ5	COQ5	0	0	0
COQ6	COQ6	0	0	0
COQ1	COQ1	0	0	0
ERV14	ERV14	0	0	0
RLF2	RLF2	0	0	0
CAJ1	CAJ1	0	0	0
MDS3	MDS3	0	0	0
NCB2	NCB2	0	0	0
RAD27	RAD27	0	0	0
PHO23	PHO23	0	0	0
RCY1	RCY1	0	0	0
PPT1	PPT1	0	0	0
YDR018C	YDR018C	0	0	0
EUG1	EUG1	0	0	0
MGM1	MGM1	0	0	0
SOD1	SOD1	0	0	0
PMS1	PMS1	0	0	0
NUC1	NUC1	0	0	0
PFA3	PFA3	0	0	0
GIR2	GIR2	0	0	0
YOR019W	YOR019W	0	0	0
PET123	PET123	0	0	0
TIM54	TIM54	0	0	0
CTR1	CTR1	0	0	0
TIM50	TIM50	0	0	0
OPY1	OPY1	0	0	0
YEL023C	YEL023C	0	0	0
FPS1	FPS1	0	0	0
YGR012W	YGR012W	0	0	0
FMN1	FMN1	0	0	0
INO80	INO80	0	0	0
TRM44	TRM44	0	0	0
TAO3	TAO3	0	0	0
NMD5	NMD5	0	0	0
APL2	APL2	0	0	0
DIP5	DIP5	0	0	0
MDE1	MDE1	0	0	0
YPL277C	YPL277C	0	0	0
MIS1	MIS1	0	0	0
YOL098C	YOL098C	0	0	0
MPD2	MPD2	0	0	0
MPD1	MPD1	0	0	0
GET1	GET1	0	0	0
GET2	GET2	0	0	0
YCR090C	YCR090C	0	0	0
RPL6A	RPL6A	0	0	0
RPL6B	RPL6B	0	0	0
RPC11	RPC11	0	0	0
CDC28	CDC28	0	0	0
CDC27	CDC27	0	0	0
CDC25	CDC25	0	0	0
CDC24	CDC24	0	0	0
CDC23	CDC23	0	0	0
RNA15	RNA15	0	0	0
LGE1	LGE1	0	0	0
BUR6	BUR6	0	0	0
TPD3	TPD3	0	0	0
NUP159	NUP159	0	0	0
RDH54	RDH54	0	0	0
NAS2	NAS2	0	0	0
RSR1	RSR1	0	0	0
XYL2	XYL2	0	0	0
RPL42A	RPL42A	0	0	0
KRE5	KRE5	0	0	0
KRE6	KRE6	0	0	0
RPL22B	RPL22B	0	0	0
SHP1	SHP1	0	0	0
SNU114	SNU114	0	0	0
RBL2	RBL2	0	0	0
NUP84	NUP84	0	0	0
QRI1	QRI1	0	0	0
TEC1	TEC1	0	0	0
NBP2	NBP2	0	0	0
MCR1	MCR1	0	0	0
PXA2	PXA2	0	0	0
IRC10	IRC10	0	0	0
SIL1	SIL1	0	0	0
VPS35	VPS35	0	0	0
VPS36	VPS36	0	0	0
MTF1	MTF1	0	0	0
MMR1	MMR1	0	0	0
UBX7	UBX7	0	0	0
CAB2	CAB2	0	0	0
MED6	MED6	0	0	0
CAB1	CAB1	0	0	0
COA1	COA1	0	0	0
MAK16	MAK16	0	0	0
CHZ1	CHZ1	0	0	0
LCB4	LCB4	0	0	0
HPR1	HPR1	0	0	0
RPS23A	RPS23A	0	0	0
THO2	THO2	0	0	0
GRX3	GRX3	0	0	0
GRX7	GRX7	0	0	0
CAT5	CAT5	0	0	0
GRX4	GRX4	0	0	0
SGF29	SGF29	0	0	0
ADE16	ADE16	0	0	0
ADE17	ADE17	0	0	0
ADE12	ADE12	0	0	0
ADE13	ADE13	0	0	0
YPP1	YPP1	0	0	0
YNK1	YNK1	0	0	0
YML44	YML44	0	0	0
IRC2	IRC2	0	0	0
IRC3	IRC3	0	0	0
RAD23	RAD23	0	0	0
TAD1	TAD1	0	0	0
ACS1	ACS1	0	0	0
EMP47	EMP47	0	0	0
RSN1	RSN1	0	0	0
GDE1	GDE1	0	0	0
PHR1	PHR1	0	0	0
KCC4	KCC4	0	0	0
PAM1	PAM1	0	0	0
MVD1	MVD1	0	0	0
MIP1	MIP1	0	0	0
YDL124W	YDL124W	0	0	0
ATF2	ATF2	0	0	0
PCA1	PCA1	0	0	0
TRZ1	TRZ1	0	0	0
GTR2	GTR2	0	0	0
VTS1	VTS1	0	0	0
ITR1	ITR1	0	0	0
DXO1	DXO1	0	0	0
MNR2	MNR2	0	0	0
RIC1	RIC1	0	0	0
IFA38	IFA38	0	0	0
VPS3	VPS3	0	0	0
VPS5	VPS5	0	0	0
VPS4	VPS4	0	0	0
MSS11	MSS11	0	0	0
XPT1	XPT1	0	0	0
REB1	REB1	0	0	0
TSC13	TSC13	0	0	0
SIP5	SIP5	0	0	0
SIP2	SIP2	0	0	0
YER186C	YER186C	0	0	0
SEC72	SEC72	0	0	0
ATP7	ATP7	0	0	0
KIN28	KIN28	0	0	0
ATP5	ATP5	0	0	0
RET3	RET3	0	0	0
RET1	RET1	0	0	0
MEX67	MEX67	0	0	0
GCD14	GCD14	0	0	0
DCS1	DCS1	0	0	0
LST4	LST4	0	0	0
POP1	POP1	0	0	0
POP7	POP7	0	0	0
POP4	POP4	0	0	0
PRI1	PRI1	0	0	0
ACE2	ACE2	0	0	0
YIL096C	YIL096C	0	0	0
HPM1	HPM1	0	0	0
RAS1	RAS1	0	0	0
HSP31	HSP31	0	0	0
PFF1	PFF1	0	0	0
PMR1	PMR1	0	0	0
TPK2	TPK2	0	0	0
RPL7B	RPL7B	0	0	0
YOP1	YOP1	0	0	0
LOA1	LOA1	0	0	0
YJU2	YJU2	0	0	0
NSE4	NSE4	0	0	0
NSE5	NSE5	0	0	0
YJU3	YJU3	0	0	0
ARO2	ARO2	0	0	0
ARO3	ARO3	0	0	0
ARO7	ARO7	0	0	0
ARO8	ARO8	0	0	0
ARO9	ARO9	0	0	0
HNM1	HNM1	0	0	0
TAN1	TAN1	0	0	0
AVO2	AVO2	0	0	0
SLY1	SLY1	0	0	0
BNA3	BNA3	0	0	0
TFB1	TFB1	0	0	0
TFB3	TFB3	0	0	0
TFB4	TFB4	0	0	0
TFB6	TFB6	0	0	0
EMC2	EMC2	0	0	0
EMC1	EMC1	0	0	0
NAB3	NAB3	0	0	0
EMC4	EMC4	0	0	0
YPT32	YPT32	0	0	0
SNU66	SNU66	0	0	0
YMR196W	YMR196W	0	0	0
YER077C	YER077C	0	0	0
GYP7	GYP7	0	0	0
CDC39	CDC39	0	0	0
CDC34	CDC34	0	0	0
CDC36	CDC36	0	0	0
CDC37	CDC37	0	0	0
ADP1	ADP1	0	0	0
HHF2	HHF2	0	0	0
ALG11	ALG11	0	0	0
PDR5	PDR5	0	0	0
IML2	IML2	0	0	0
YPK1	YPK1	0	0	0
ALY2	ALY2	0	0	0
TDA9	TDA9	0	0	0
MAP1	MAP1	0	0	0
RPN10	RPN10	0	0	0
RPN11	RPN11	0	0	0
RPL23B	RPL23B	0	0	0
ALK1	ALK1	0	0	0
TRM732	TRM732	0	0	0
YOR296W	YOR296W	0	0	0
IRC20	IRC20	0	0	0
MAK3	MAK3	0	0	0
VPS20	VPS20	0	0	0
VPS21	VPS21	0	0	0
VPS27	VPS27	0	0	0
VPS24	VPS24	0	0	0
VPS28	VPS28	0	0	0
VPS29	VPS29	0	0	0
SNG1	SNG1	0	0	0
MMS2	MMS2	0	0	0
PUB1	PUB1	0	0	0
MHO1	MHO1	0	0	0
FKS3	FKS3	0	0	0
ALD4	ALD4	0	0	0
PAN2	PAN2	0	0	0
RPL34B	RPL34B	0	0	0
ILV6	ILV6	0	0	0
CHO2	CHO2	0	0	0
MRS6	MRS6	0	0	0
SNT309	SNT309	0	0	0
ASI3	ASI3	0	0	0
NRP1	NRP1	0	0	0
OAC1	OAC1	0	0	0
PBP4	PBP4	0	0	0
HAP1	HAP1	0	0	0
PAN5	PAN5	0	0	0
COX14	COX14	0	0	0
CWP1	CWP1	0	0	0
SPE3	SPE3	0	0	0
YHR097C	YHR097C	0	0	0
STE2	STE2	0	0	0
RAD17	RAD17	0	0	0
YJL171C	YJL171C	0	0	0
PRX1	PRX1	0	0	0
KEL1	KEL1	0	0	0
OXP1	OXP1	0	0	0
YHL018W	YHL018W	0	0	0
AAH1	AAH1	0	0	0
PAL1	PAL1	0	0	0
MRPL15	MRPL15	0	0	0
DMA2	DMA2	0	0	0
LIP2	LIP2	0	0	0
LIP5	LIP5	0	0	0
SXM1	SXM1	0	0	0
CBF1	CBF1	0	0	0
DLS1	DLS1	0	0	0
RIB3	RIB3	0	0	0
SCD6	SCD6	0	0	0
FMP27	FMP27	0	0	0
OPI1	OPI1	0	0	0
SUI1	SUI1	0	0	0
REE1	REE1	0	0	0
LYS14	LYS14	0	0	0
SWM2	SWM2	0	0	0
YHR080C	YHR080C	0	0	0
SMT3	SMT3	0	0	0
PAC10	PAC10	0	0	0
FSF1	FSF1	0	0	0
NAS6	NAS6	0	0	0
SEC65	SEC65	0	0	0
PTM1	PTM1	0	0	0
ACF4	ACF4	0	0	0
TOF1	TOF1	0	0	0
YNL134C	YNL134C	0	0	0
YNR061C	YNR061C	0	0	0
TIF5	TIF5	0	0	0
TRR1	TRR1	0	0	0
SAP190	SAP190	0	0	0
TPT1	TPT1	0	0	0
YPL199C	YPL199C	0	0	0
TRS120	TRS120	0	0	0
FMP41	FMP41	0	0	0
HSP26	HSP26	0	0	0
PRD1	PRD1	0	0	0
GSY1	GSY1	0	0	0
MGA2	MGA2	0	0	0
MGA1	MGA1	0	0	0
GSY2	GSY2	0	0	0
SCY1	SCY1	0	0	0
FUN14	FUN14	0	0	0
YME1	YME1	0	0	0
HUL4	HUL4	0	0	0
YME2	YME2	0	0	0
ASK10	ASK10	0	0	0
PAP1	PAP1	0	0	0
ERO1	ERO1	0	0	0
RPS31	RPS31	0	0	0
RTC5	RTC5	0	0	0
YER156C	YER156C	0	0	0
SLX4	SLX4	0	0	0
SLX9	SLX9	0	0	0
ATM1	ATM1	0	0	0
TFC3	TFC3	0	0	0
TFC4	TFC4	0	0	0
PUS2	PUS2	0	0	0
AIM9	AIM9	0	0	0
PUS7	PUS7	0	0	0
AIM5	AIM5	0	0	0
PUS9	PUS9	0	0	0
AIM6	AIM6	0	0	0
APP1	APP1	0	0	0
AIM2	AIM2	0	0	0
YMS_A	YMS_A	0	0	0
GCN5	GCN5	0	0	0
FOL1	FOL1	0	0	0
SFM1	SFM1	0	0	0
PYK2	PYK2	0	0	0
TRI1	TRI1	0	0	0
RPL4B	RPL4B	0	0	0
CNB1	CNB1	0	0	0
YJL147C	YJL147C	0	0	0
STV1	STV1	0	0	0
RPL40B	RPL40B	0	0	0
RPA12	RPA12	0	0	0
QDR1	QDR1	0	0	0
SVF1	SVF1	0	0	0
DAM1	DAM1	0	0	0
SPC34	SPC34	0	0	0
GIT1	GIT1	0	0	0
TEA1	TEA1	0	0	0
PTC1	PTC1	0	0	0
TAF2	TAF2	0	0	0
SFT1	SFT1	0	0	0
[truncated: 735 more rows]
